# Supplementary material for: Community Structure, Dynamics and Interactions of Bacteria, Archaea and Fungi in Subtropical Coastal Wetland Sediments
Source: PubMed Central journal article supplement (PMC6158284; doi:10.1038/s41598-018-32529-5), 2018-09-26
Supplement: 41598_2018_32529_MOESM1_ESM.pdf [file 41598_2018_32529_MOESM1_ESM.pdf]

# **Community Structure, Dynamics and Interactions of Bacteria, Archaea and Fungi in Subtropical Coastal Wetland Sediments**

**Man Kit Cheung<sup>1</sup>, Chong Kim Wong<sup>1</sup>, Ka Hou Chu<sup>1</sup>, and Hoi Shan Kwan<sup>1\*</sup>**

<sup>1</sup>School of Life Sciences, The Chinese University of Hong Kong, Hong Kong SAR, China

**\*Correspondence:**

Prof. Hoi Shan Kwan

hoishankwan@cuhk.edu.hk

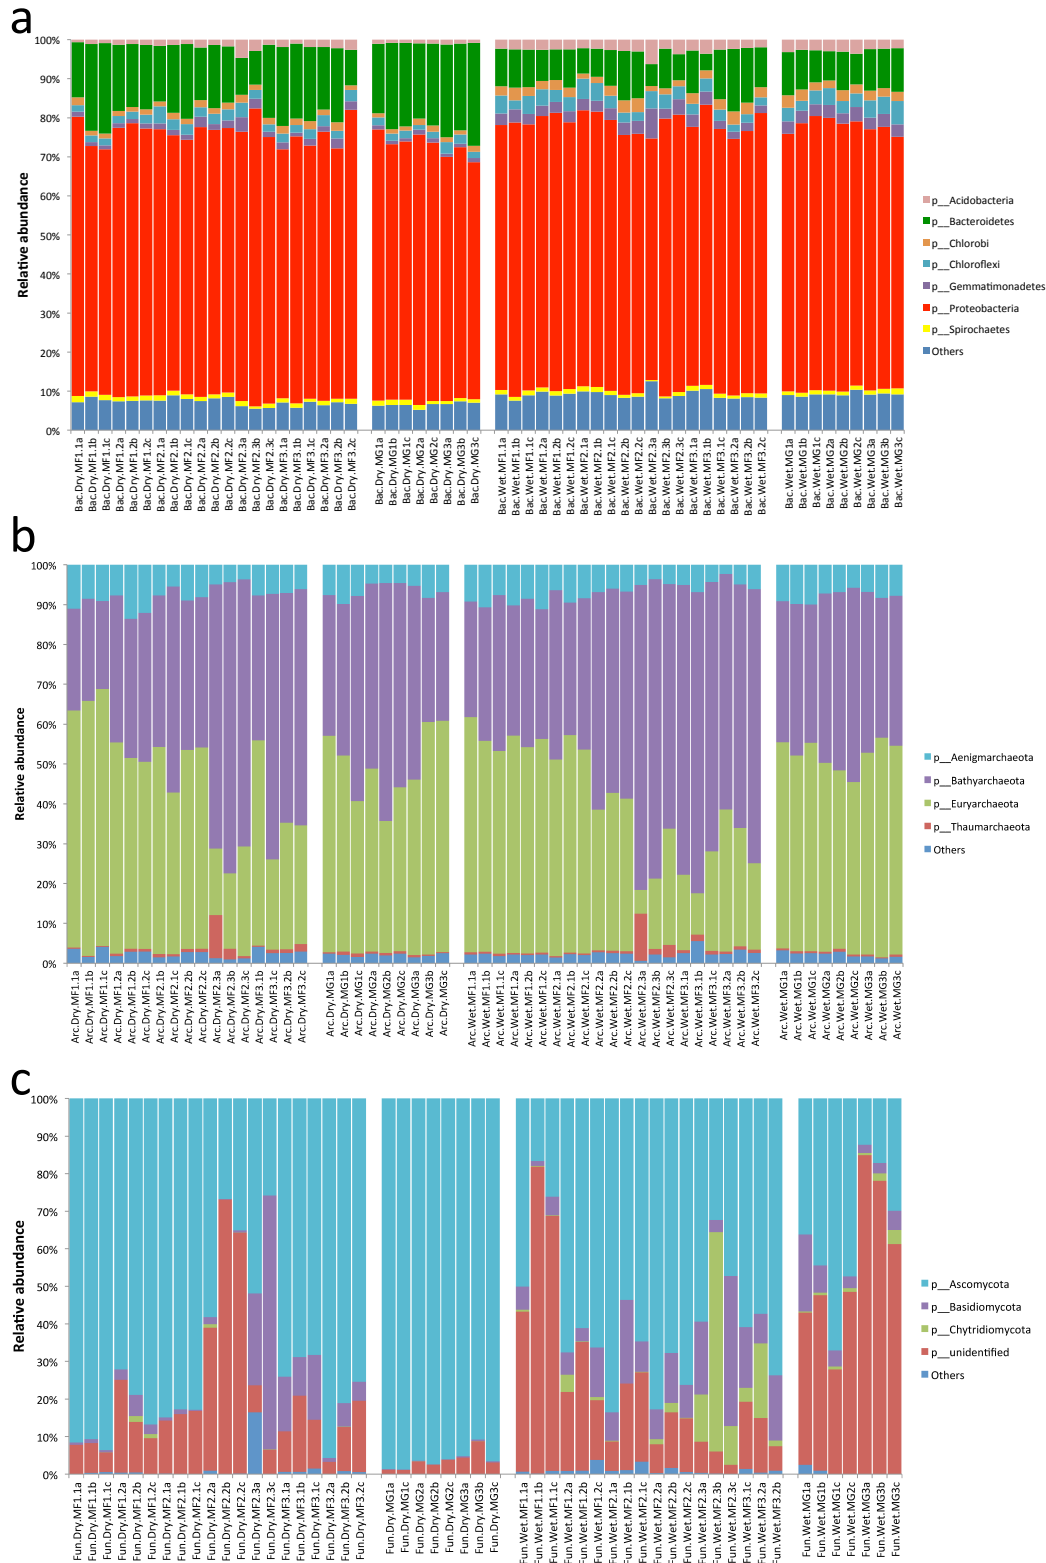

**Figure S1.** Relative abundance of dominant phyla of (a) bacteria, (b) archaea, and (c) fungi according to the number of sequence reads. Only groups with an average relative abundance  $\geq 1\%$  are shown here. Dry: dry season, Wet: wet season; MF: mudflat, MG: mangrove.

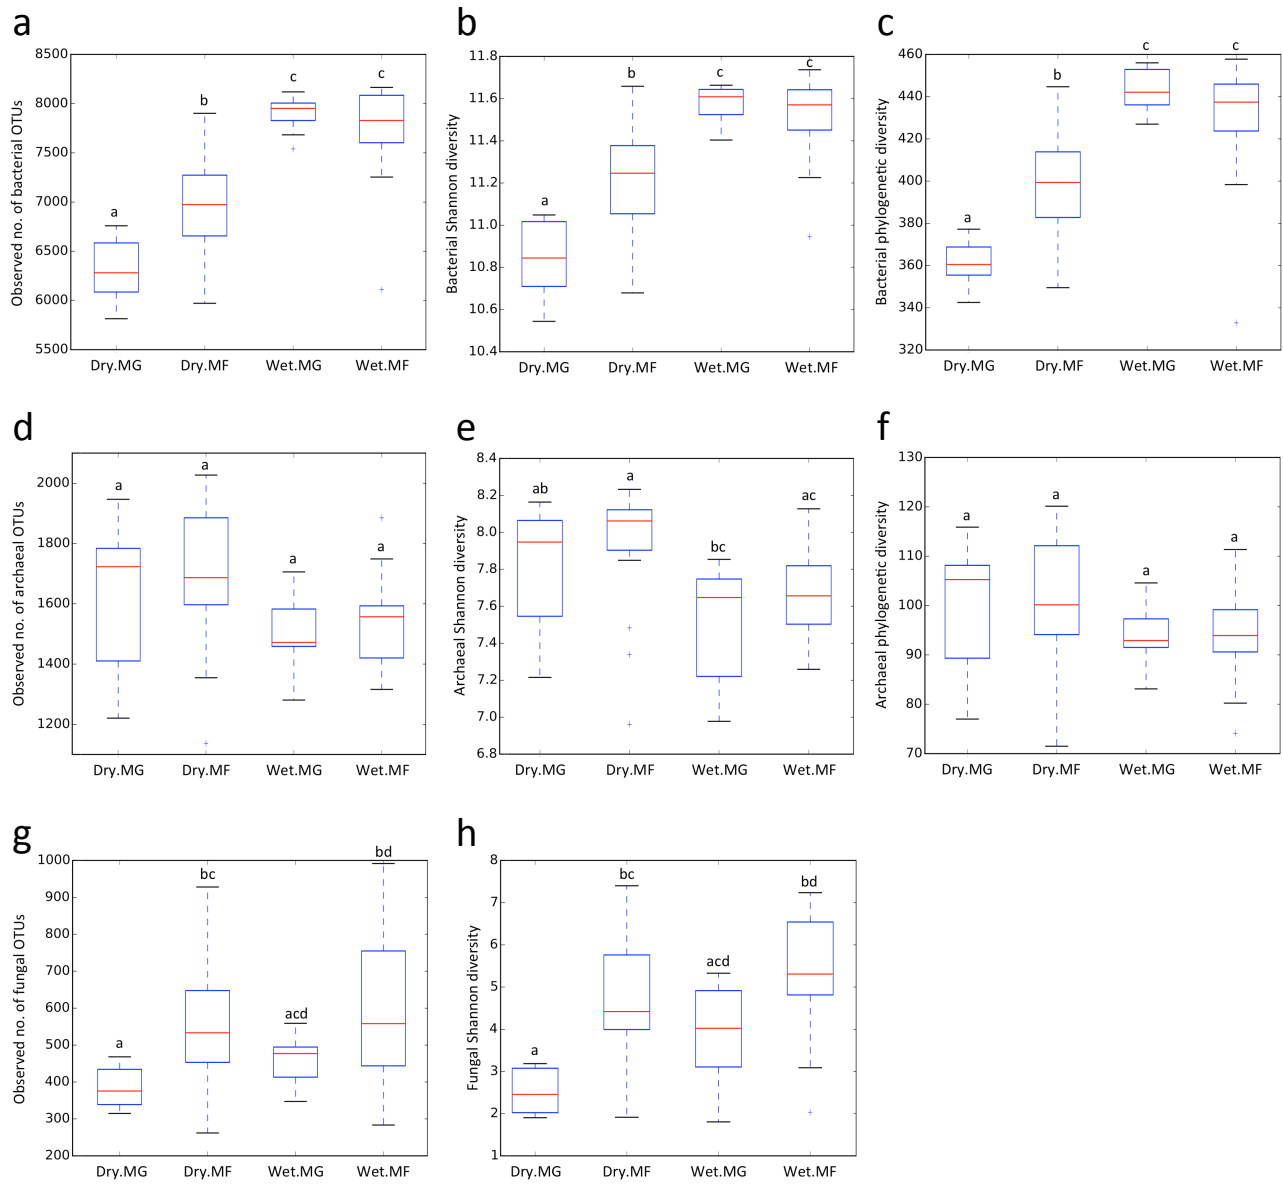

**Figure S2.** Alpha diversity estimates of (a-c) bacterial, (d-f) archaeal, and (g-h) fungal communities. The bacterial, archaeal and fungal datasets were rarefied to 20,310 reads, 20,300 reads, and 20,250 reads, respectively, before calculations. Different letters indicate statistically different means at  $P < 0.05$ . MF: mudflat, MG: mangrove.

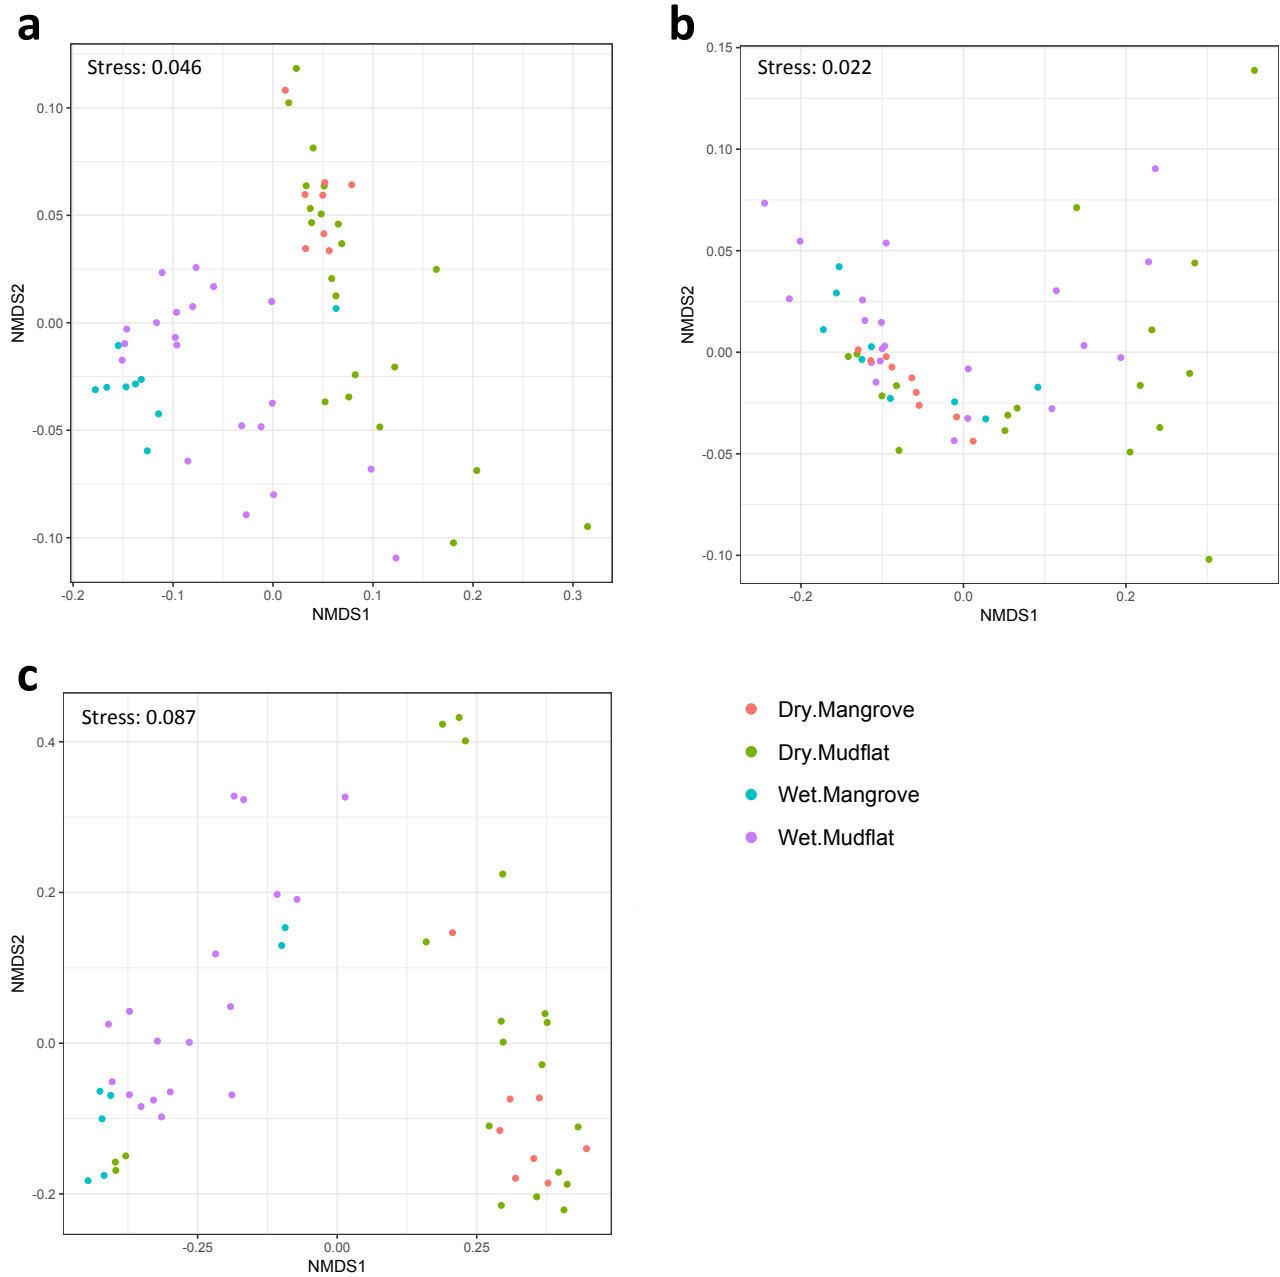

**Figure S3.** Non-metric multidimensional scaling (NMDS) plots of (a) bacterial, (b) archaeal and (c) fungal communities. Weighted UniFrac distances were used for bacteria and archaea whereas Bray-Curtis distances were used for fungi. Dry: dry season, Wet: wet season.

**Table S1.** Physico-chemical parameters of Mai Po wetland surface sediments

| <i>Season</i> | <i>Region</i> | <i>n</i> | <i>pH</i>                    | <i>ORP (mV)</i>                  | <i>TC (%)</i>                | <i>TN (%)</i>                | <i>TS (%)</i>                |
|---------------|---------------|----------|------------------------------|----------------------------------|------------------------------|------------------------------|------------------------------|
| Dry           | Mudflat       | 21       | 7.48<br>(±0.15) <sup>a</sup> | -125.48<br>(±14.37) <sup>a</sup> | 1.45<br>(±0.59) <sup>a</sup> | 0.13<br>(±0.02) <sup>a</sup> | 0.86<br>(±0.15) <sup>a</sup> |
|               | Mangrove      | 9        | 6.61<br>(±0.40) <sup>b</sup> | 65.78<br>(±67.68) <sup>b</sup>   | 3.05<br>(±1.33) <sup>b</sup> | 0.19<br>(±0.08) <sup>b</sup> | 0.65<br>(±0.18) <sup>b</sup> |
| Wet           | Mudflat       | 21       | 7.48<br>(±0.15) <sup>a</sup> | -99.14<br>(±22.41) <sup>c</sup>  | 1.06<br>(±0.69) <sup>a</sup> | 0.11<br>(±0.01) <sup>c</sup> | 0.81<br>(±0.13) <sup>a</sup> |
|               | Mangrove      | 9        | 6.74<br>(±0.36) <sup>b</sup> | 22.89<br>(±99.42) <sup>b</sup>   | 2.29<br>(±0.92) <sup>b</sup> | 0.22<br>(±0.06) <sup>b</sup> | 0.59<br>(±0.09) <sup>b</sup> |

Abbreviations: n, number of samples; ORP, redox potential; TC, total carbon; TN, total nitrogen; TS, total sulphur. Values are presented as mean (± standard deviation). Small letters indicate statistically significant differences (P<0.05) between individual means assessed by t-tests.

**Table S2.** Summary of alpha diversity statistics

| <i>Kingdom</i> | <i>Season</i> | <i>Region</i> | <i>n</i> | <i>Obs</i>   | <i>Shannon</i> | <i>PD</i> | <i>Good</i> |
|----------------|---------------|---------------|----------|--------------|----------------|-----------|-------------|
| Bacteria       | Dry           | Mudflat       | 21       | 6,956 (±483) | 11.20 (±0.25)  | 396 (±25) | 0.77        |
|                |               | Mangrove      | 8        | 6,308 (±303) | 10.84 (±0.17)  | 361 (±10) | 0.79        |
|                | Wet           | Mudflat       | 20       | 7,733 (±457) | 11.51 (±0.19)  | 429 (±28) | 0.73        |
|                |               | Mangrove      | 9        | 7,886 (±170) | 11.58 (±0.08)  | 443 (±9)  | 0.73        |
| Archaea        | Dry           | Mudflat       | 17       | 1,713 (±237) | 7.93 (±0.34)   | 102 (±13) | 0.96        |
|                |               | Mangrove      | 9        | 1,626 (±240) | 7.80 (±0.35)   | 99 (±13)  | 0.96        |
|                | Wet           | Mudflat       | 21       | 1,535 (±143) | 7.66 (±0.22)   | 94 (±8)   | 0.96        |
|                |               | Mangrove      | 9        | 1,507 (±113) | 7.51 (±0.32)   | 94 (±6)   | 0.96        |
| Fungi          | Dry           | Mudflat       | 20       | 556 (±159)   | 4.63 (±1.38)   | —         | 0.99        |
|                |               | Mangrove      | 8        | 385 (±55)    | 2.52 (±0.50)   | —         | 0.99        |
|                | Wet           | Mudflat       | 18       | 603 (±202)   | 5.38 (±1.40)   | —         | 0.99        |
|                |               | Mangrove      | 7        | 457 (±67)    | 3.89 (±1.22)   | —         | 0.99        |

Abbreviations: n, number of samples; Obs, number of observed OTUs; Shannon, Shannon diversity index; PD, phylogenetic diversity; Good, Good's coverage. Datasets of bacteria, archaea and fungi were normalized to 20,310 reads, 20,300 reads and 20,250 reads per sample, respectively. Alpha diversity measures are presented as mean (± standard deviation). PD values were not calculated for fungi because ITS-based phylogenetic tree of fungi is generally not considered informative.

**Table S3.** Effects of all explanatory variables on microbial communities

| <i>Kingdom</i> | <i>Variable</i> | <i>Variance explained</i> | <i>pseudo-F</i> | <i>P-value</i>      |
|----------------|-----------------|---------------------------|-----------------|---------------------|
| Bacteria       | pH              | 0.019                     | 1.653           | 0.147 <sup>NS</sup> |
|                | ORP             | 0.016                     | 1.349           | 0.224 <sup>NS</sup> |
|                | TC              | 0.048                     | 4.122           | 0.006**             |
|                | TN              | 0.024                     | 2.065           | 0.086 <sup>NS</sup> |
|                | TS              | 0.021                     | 1.807           | 0.095 <sup>NS</sup> |
|                | Temp            | 0.295                     | 25.210          | 0.001***            |
|                | ObsArc          | 0.023                     | 1.990           | 0.105 <sup>NS</sup> |
|                | ShnArc          | 0.069                     | 5.889           | 0.001***            |
|                | ObsFun          | 0.028                     | 2.359           | 0.051 <sup>NS</sup> |
|                | ShnFun          | 0.035                     | 3.015           | 0.020*              |
|                | Final model     | 0.579                     | 4.946           | 0.011***            |
| Archaea        | pH              | 0.017                     | 1.147           | 0.270 <sup>NS</sup> |
|                | ORP             | 0.010                     | 0.679           | 0.550 <sup>NS</sup> |
|                | TC              | 0.023                     | 1.540           | 0.181 <sup>NS</sup> |
|                | TN              | 0.024                     | 1.572           | 0.148 <sup>NS</sup> |
|                | TS              | 0.011                     | 0.721           | 0.445 <sup>NS</sup> |
|                | Temp            | 0.024                     | 1.606           | 0.164 <sup>NS</sup> |
|                | ObsBac          | 0.030                     | 1.963           | 0.107 <sup>NS</sup> |
|                | ShnBac          | 0.184                     | 12.252          | 0.001***            |
|                | ObsFun          | 0.104                     | 6.941           | 0.002**             |
|                | ShnFun          | 0.031                     | 2.054           | 0.105 <sup>NS</sup> |
|                | Final model     | 0.458                     | 3.047           | 0.001***            |
| Fungi          | pH              | 0.026                     | 1.731           | 0.045*              |
|                | ORP             | 0.025                     | 1.670           | 0.070 <sup>NS</sup> |
|                | TC              | 0.034                     | 2.244           | 0.015*              |
|                | TN              | 0.027                     | 1.748           | 0.057 <sup>NS</sup> |
|                | TS              | 0.017                     | 1.134           | 0.272 <sup>NS</sup> |
|                | Temp            | 0.199                     | 13.155          | 0.001***            |
|                | ObsBac          | 0.043                     | 2.853           | 0.002**             |
|                | ShnBac          | 0.032                     | 2.110           | 0.023*              |
|                | ObsArc          | 0.018                     | 1.204           | 0.213 <sup>NS</sup> |
|                | ShnArc          | 0.032                     | 2.121           | 0.024*              |
|                | Final model     | 0.454                     | 2.997           | 0.001***            |

Abbreviations: ORP, redox potential; TC: total carbon; TN: total nitrogen; TS: total sulphur; Temp, temperature; Obs: number of observed OTUs; Shn, Shannon diversity; Bac: bacteria; Arc: archaea; Fun: fungi. Tests on bacteria and archaea were based on weighted UniFrac distances whereas Bray-Curtis distances were used for fungi. Final model includes all listed explanatory variables. Significance was tested by ANOVA: \*P<0.05, \*\*P<0.01, \*\*\*P<0.001, <sup>NS</sup>nonsignificant.

**Table S4.** Network parameters of co-occurrence networks

|                            | <i>Bacteria</i> |            | <i>Archaea</i> |            | <i>Fungi</i> |            |
|----------------------------|-----------------|------------|----------------|------------|--------------|------------|
|                            | <i>Dry</i>      | <i>Wet</i> | <i>Dry</i>     | <i>Wet</i> | <i>Dry</i>   | <i>Wet</i> |
| Number of nodes            | 229             | 221        | 249            | 252        | 72           | 66         |
| Number of edges            | 3,605           | 3,012      | 4,126          | 5,005      | 361          | 101        |
| Avg. number of neighbors   | 31.485          | 27.258     | 33.141         | 39.722     | 10.028       | 3.061      |
| Network density            | 0.138           | 0.124      | 0.134          | 0.158      | 0.141        | 0.047      |
| Connected components       | 1               | 1          | 4              | 1          | 2            | 11         |
| Network diameter           | 8               | 10         | 11             | 8          | 8            | 6          |
| Network radius             | 5               | 5          | 1              | 5          | 2            | 1          |
| Clustering coefficient     | 0.668           | 0.650      | 0.617          | 0.716      | 0.628        | 0.353      |
| Characteristic path length | 3.220           | 3.521      | 3.433          | 3.232      | 2.636        | 2.865      |
| Network centralization     | 0.188           | 0.233      | 0.166          | 0.162      | 0.246        | 0.094      |
| Network heterogeneity      | 0.669           | 0.686      | 0.732          | 0.687      | 0.694        | 0.782      |
